# Supplementary material for: Facilely assess the soluble behaviour of the β-nucleating agent by gradient temperature field for the construction of heterogeneous crystalline-frameworks in iPP
Source: Royal Society of Chemistry journal article supplement (doi:10.1039/c5sm02030a), 2015-10-13
Supplement: c5sm02030a1.pdf [file c5sm02030a1.pdf]

Supporting Information

**Facilely Assess The Soluble Behaviour of  $\beta$ -Nucleating Agent by  
Gradient Temperature Field for Construction of Heterogeneous  
Crystalline-Frameworks in iPP**

**Zhiqiang Wu<sup>a</sup>, Gang Wang<sup>a</sup>, Mengwei Zhang<sup>a</sup>, Ke Wang<sup>a,\*</sup>, and Qiang Fu<sup>a,\*</sup>**

---

<sup>a</sup> College of Polymer Science and Engineering, Sichuan University, State Key Laboratory of Polymer Materials Engineering, Chengdu 610065,  
People's Republic of China

Tel: 0086-28-85461795, Emails: [wkestar@scu.edu.cn](mailto:wkestar@scu.edu.cn) (K. W.), [qiangfu@scu.edu.cn](mailto:qiangfu@scu.edu.cn) (Q. F.)

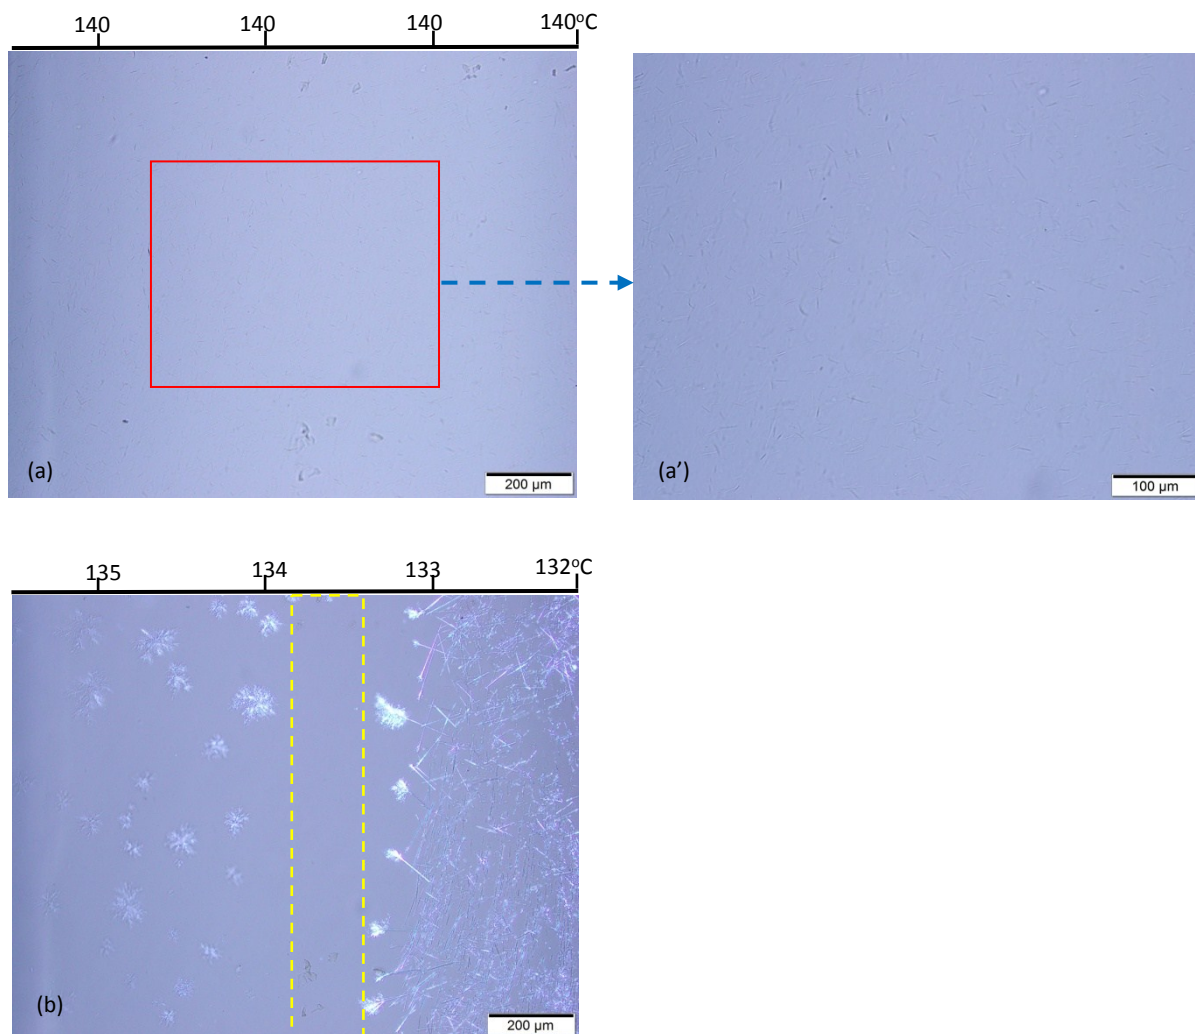

Fig. S1 Nucleation morphology of the specimen with 0.05 %  $\beta$ -NA obtained via (a) homo-T field and (b) g-T field treatment. Both of (a) and (b) were achieved on the same specimen under the same observed window. The  $T_f$  in homo-T field is 195 °C, while the  $T_f$  range for g-T field is within 217 to 220 °C. The cooling rate was fixed as 5 °C/min, and (a) was acquired at 140 °C and (b) at around 134 °C.

A comparative analysis between homo-T field and g-T field is presented as Fig. S1. The specimen was undergone by homo-T and g-T field sequentially. Numerous microfibril-like entities are found everywhere in Fig. S1(a), especially in an amplification view-field, after experienced homo-T field. It indicates an extremely uniform dispersion of  $\beta$ -NA substance in the initial specimen. However, under the same observation window, by suffering the influence of g-T field the distinct blank zone in which no nucleation affair occurred is emphasized by yellow dash-line rectangle, as shown in Fig. S1(b), indicating that  $\beta$ -NA components originally existed in this zone have migrated to the prior-formed NA frameworks.

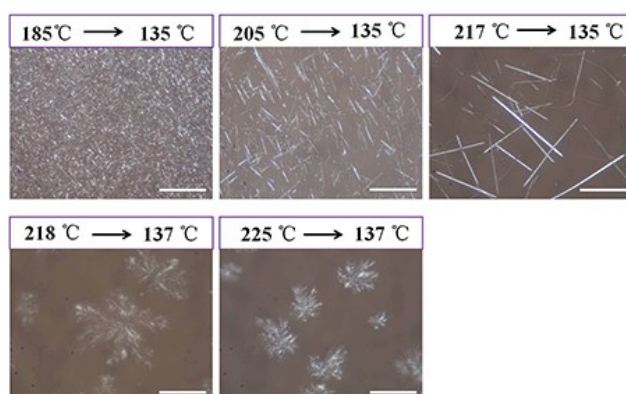

Fig. S2 Morphological photographs of crystalline framework generated in the iPP/WBG- II specimen with 0.1 %  $\beta$ -NA (the scale bar is 100  $\mu$ m)

The morphologies of  $\beta$ -NA framework in the specimen with 0.1 % WBG- II are demonstrated as Fig. S2. The morphological features and the rule of construction of  $\beta$ -NA crystalline framework as a function of  $T_f$  are almost same to the case of 0.3 % concentration, except for the dendritic entities are more dense and with significantly smaller size. This difference in dendritic morphology is due to the absolute amount of WBG- II reduced substantially. In accordance with expectation, the abrupt change from needle to dendrite is also identified, and the critical  $T_f$  of entirely dissolvable  $\beta$ -NA is 218 °C at this WBG- II concentration, which is well accordance with the result achieved under g-T field (seeing Fig. 2).

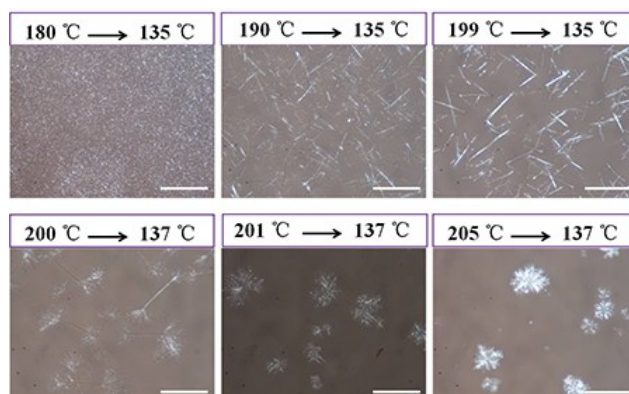

Fig. S3 Morphological photographs of crystalline framework generated in the iPP/WBG- II specimen with 0.05 %  $\beta$ -NA (the scale bar is 100  $\mu$ m)

As to a lower concentration, 0.05 %, the flower-like supermolecular structure appears between needles and dendrites, as showing in Fig. S2. It should be noted that the transformations from needle to flowers, then to dendrites are all over a narrow temperature scope of 1 °C, and the critical  $T_f$  for the full solubility of  $\beta$ -NA is determined at 201 °C. Obviously, the more the  $\beta$ -NA amount, the higher the critical  $T_f$  is received.
